# Supplementary material
Source: PubMed Central journal article supplement (PMC6129474)
Supplement: mmc1.pdf [file mmc1.pdf]

**Biophysical Journal, Volume 114**

**Supplemental Information**

**Multivalent Cation-Bridged PI(4,5)P<sub>2</sub> Clusters Form at Very Low Concentrations**

**Yi Wen, Volker M. Vogt, and Gerald W. Feigenson**

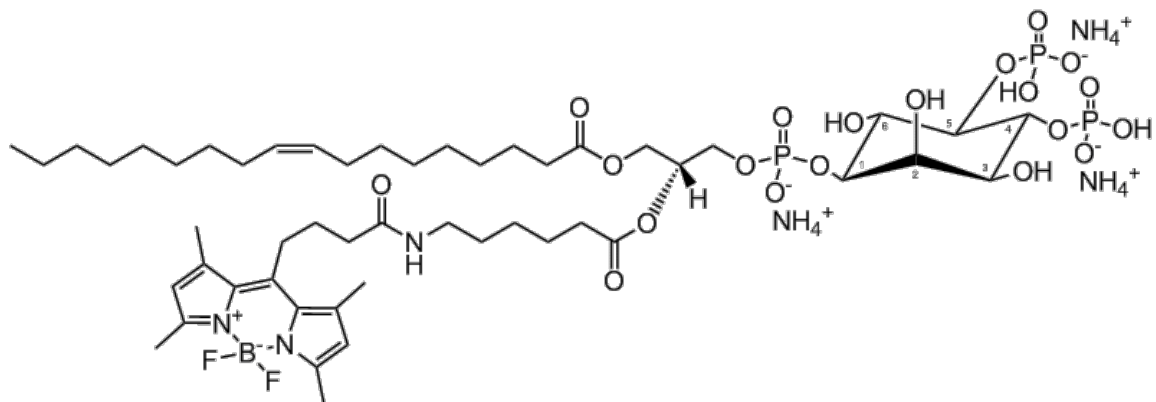

TF-PIP2

1-oleoyl-2-{6-[4-(dipyrometheneboron difluoride)butanoyl]amino}hexanoyl-*sn*-glycero-3-phosphoinositol-4,5-bisphosphate (ammonium salt)

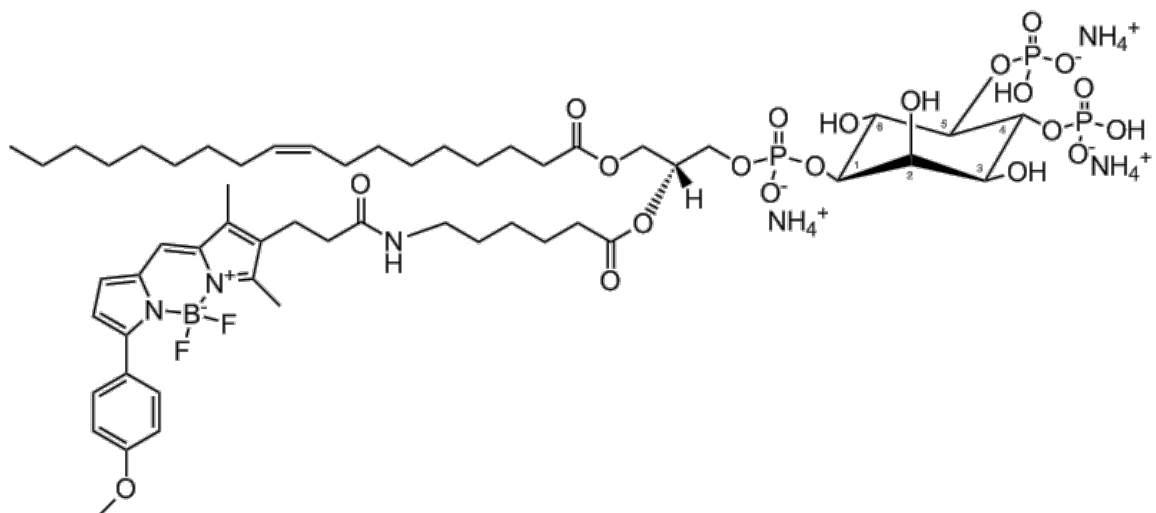

TMR-PIP2

1-oleoyl-2-(6-((4,4-difluoro-1,3-dimethyl-5-(4-methoxyphenyl)-4-bora-3a,4a-diaza-s-indacene-2-propionyl)amino)hexanoyl)-*sn*-glycero-3-phosphoinositol-4,5-bisphosphate (ammonium salt)

**Fig. S1.** Chemical structures of TF-PIP2 (top) and TMR-PIP2 (bottom)

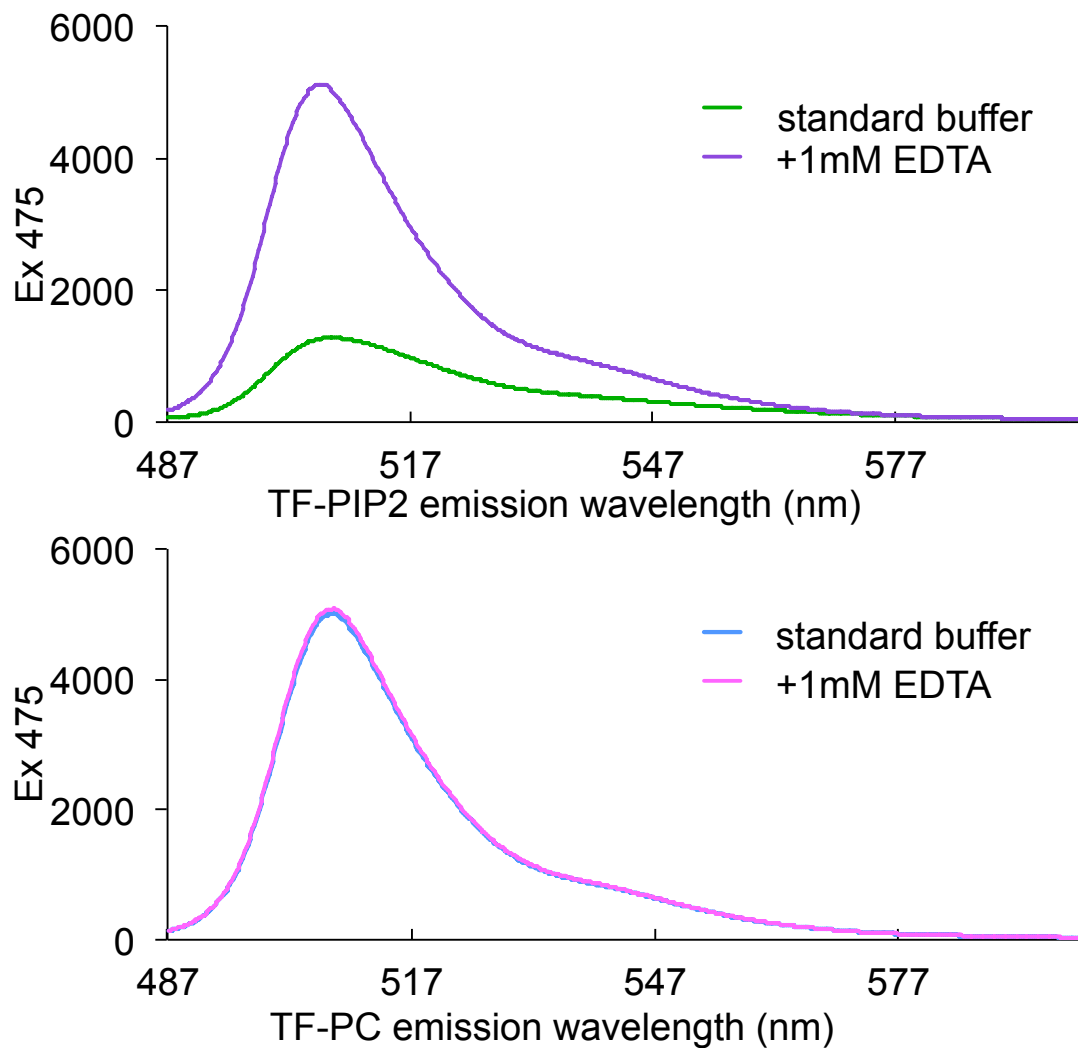

**Fig. S2.** EDTA eliminates self quenching of TF-PIP2, but has no effect on TF-PC in POPE/POPS/Chol (34/30/36). The emission spectrum of 0.3 mol% TF-PIP2 (top) and TF-PC (bottom) in inner leaflet model membranes was collected in standard buffer and in 1 mM EDTA.

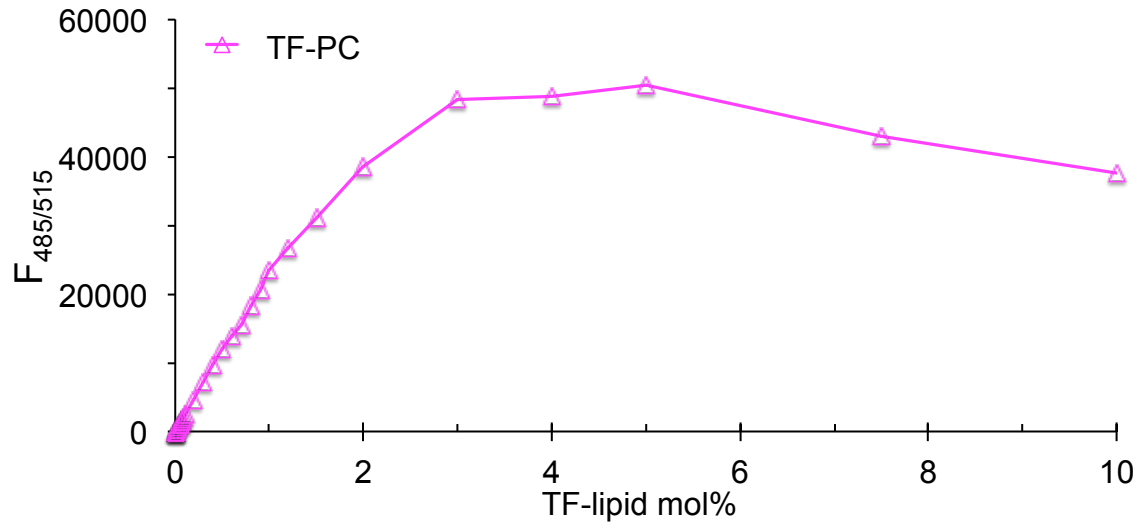

**Fig. S3.** Self-quenching of TF-PC occurs only above ~2% of total lipids, at least 50-fold higher than for TF-PIP2. Assays were performed as in Fig. 1.

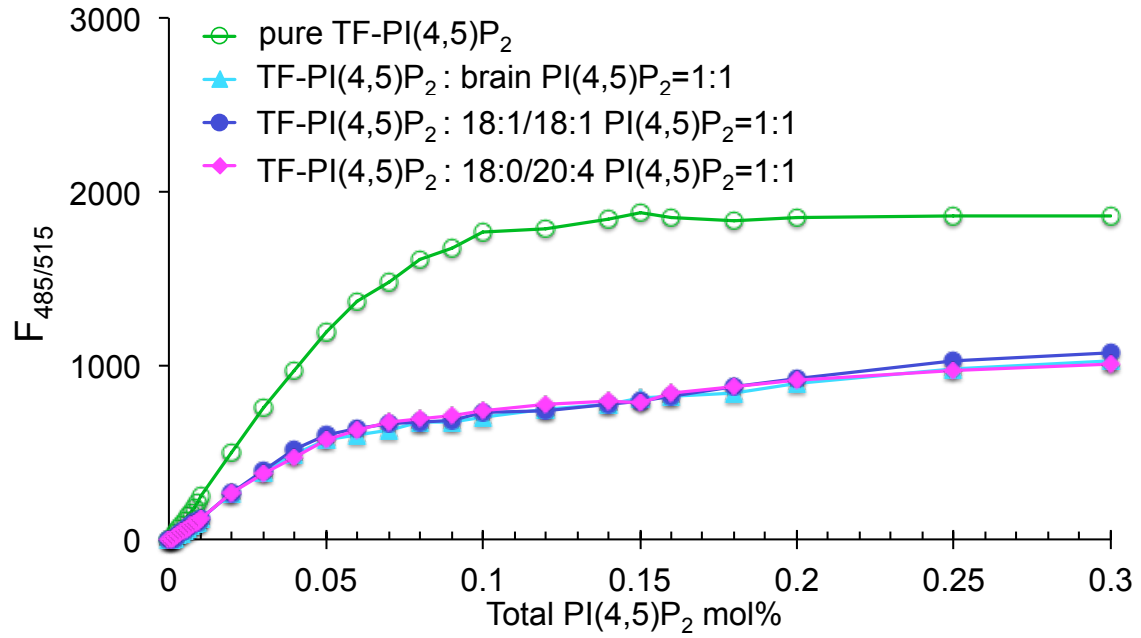

**Fig. S4.** Unlabeled PIP2 incorporates into TF-PIP2 clusters. Self-quenching assays were carried out in POPE/POPS/Chol (34/30/36) as in Fig. 1. Pure TF-labeled PIP2 (green) is diluted 1:1 with unlabeled PIP2, either brain-PIP2 (cyan), 18:1/18:1-PIP2 (blue), or 18:0/20:4-PIP2 (magenta).

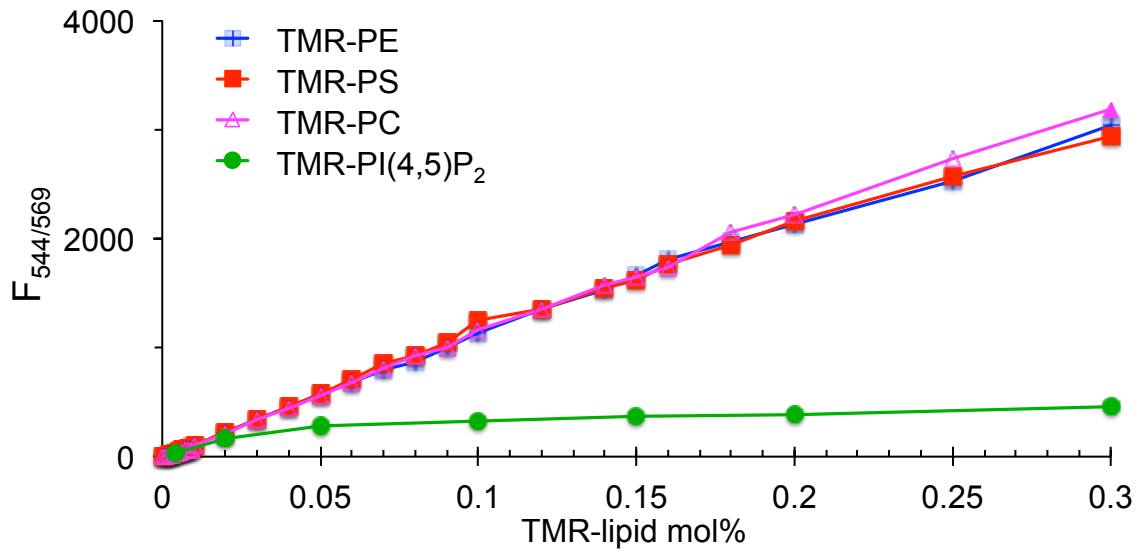

**Fig. S5.** TMR-PIP2 forms cation-bridged clusters, but other TMR-labeled phospholipids do not. Self-quenching measured as in Fig. 1 with results similar to those with TF-PIP2 shown in Fig. 1. TMR-PE (blue), TMR-PS (red), TMR-PC (magenta) and TMR-PIP2 (green).

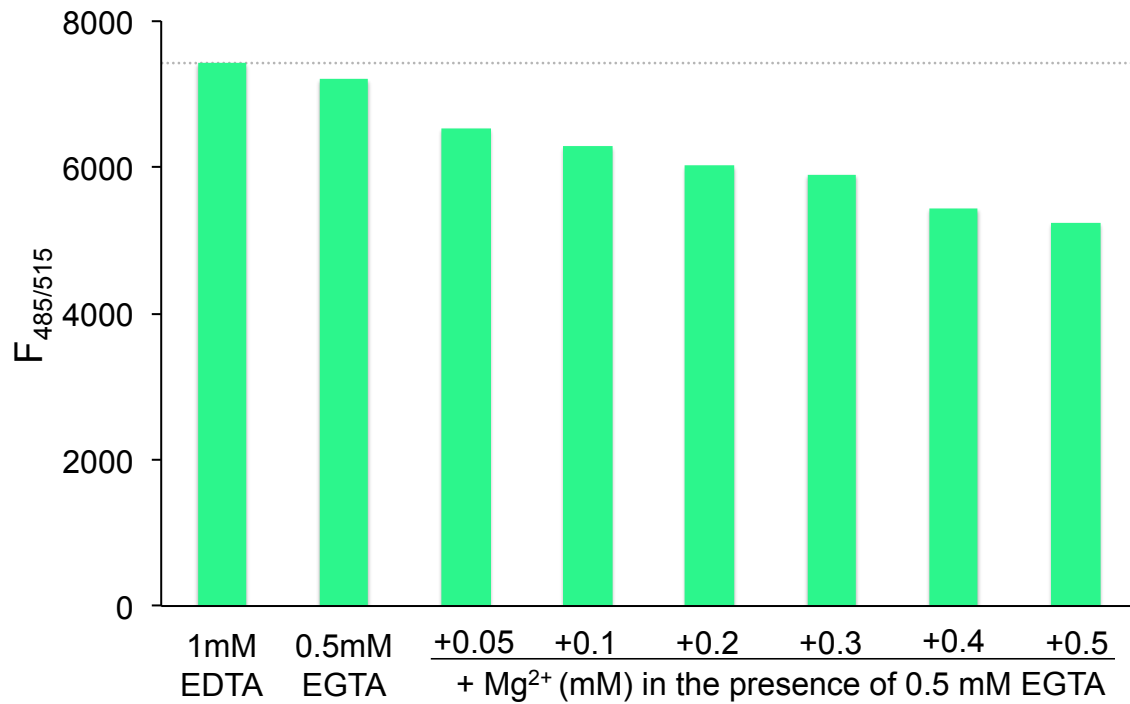

**Fig. S6.** Mg<sup>2+</sup> drives PIP2 clustering. Bars represent the fluorescence from a fixed 0.3 mol% TF-PIP2 in POPE/POPS/Chol (34/30/36) with the following additions: 1mM EDTA, 0.5 mM EGTA, or increasing concentrations of Mg<sup>2+</sup> from 0.05 mM up to 0.5 mM in the presence of 0.5mM EGTA.

**Table S1**

| Multivalent cation analysis by ICP-OES                                |                        |                        |                        |                        |                        |
|-----------------------------------------------------------------------|------------------------|------------------------|------------------------|------------------------|------------------------|
| Metal ion [ $\mu\text{M}$ ]                                           | <b>Al<sup>3+</sup></b> | <b>Ca<sup>2+</sup></b> | <b>Fe<sup>3+</sup></b> | <b>Mg<sup>2+</sup></b> | <b>Zn<sup>2+</sup></b> |
| MQ H <sub>2</sub> O                                                   | -                      | -                      | -                      | -                      | -                      |
| 5 $\mu\text{M}$ TF-PI(4,5)P <sub>2</sub> (in MQ H <sub>2</sub> O)     | 0.4                    | 0.2                    | -                      | -                      | 0.1                    |
| 5 $\mu\text{M}$ TMR-PI(4,5)P <sub>2</sub> (in MQ H <sub>2</sub> O)    | 0.2                    | 0.5                    | -                      | -                      | 0.1                    |
| 10 $\mu\text{M}$ Brain-PI(4,5)P <sub>2</sub> (in MQ H <sub>2</sub> O) | 0.2                    | 0.5                    | -                      | 0.2                    | 0.4                    |
| 6.3 $\mu\text{M}$ POPS (in MQ H <sub>2</sub> O)                       | 0.2                    | 0.2                    | -                      | -                      | -                      |
| 63 $\mu\text{M}$ POPS (in MQ H <sub>2</sub> O)                        | 0.3                    | 0.4                    | -                      | -                      | -                      |

Note: “-“ means undetectable (< 0.1  $\mu\text{M}$ ).
